# Supplementary material
Source: publisher site journal article supplement (https://www.spandidos-publications.com/7700/downloadSupplementary)

Figure S1. Plasmid transfection efficiency verified by reverse transcription-quantitative PCR. Transfection efficiency of (A) pc-SLC2A4 and (B) pc-FoxO1 in HTR-8/SVneo cells. \*\*P<0.01 vs. pc-NC. NC, negative control; SLC2A4, solute carrier family 2 member 4; FoxO, Forkhead box O.

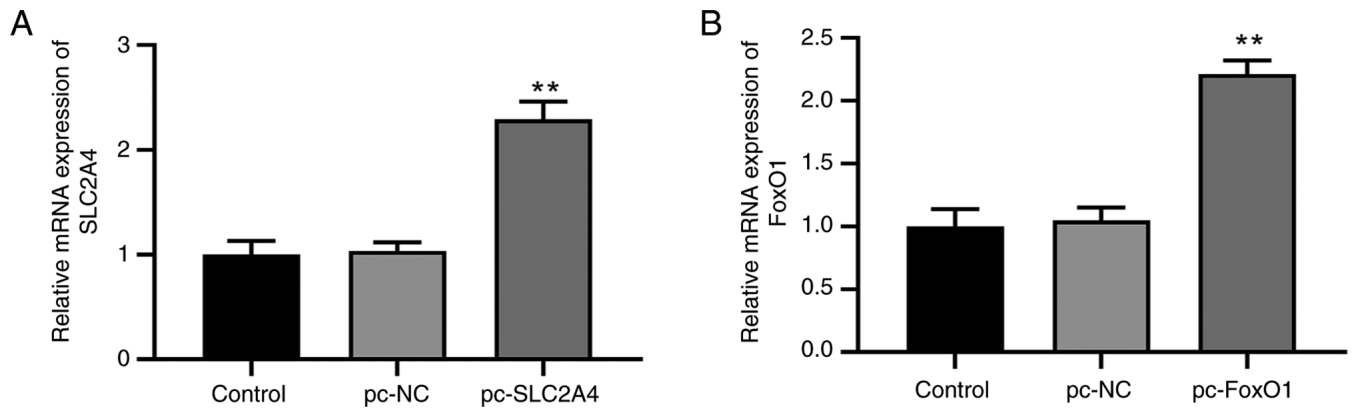

Supplement: Supplementary file 1 [file downloadSupplementary]
